# Supplementary material
Source: PubMed Central journal article supplement (PMC3144125)
Supplement: supp_0022034510389334_JDR389334_Appendix.pdf [file supp_0022034510389334_JDR389334_Appendix.pdf]

## RESEARCH REPORTS

### Clinical

T. Morelli<sup>1,2</sup>, R. Neiva<sup>1,2</sup>, M.L. Nevins<sup>3</sup>,  
M.K. McGuire<sup>4</sup>, E.T. Scheyer<sup>4</sup>, T.J. Oh<sup>1,2</sup>,  
T.M. Braun<sup>2,5</sup>, J.E. Nör<sup>6</sup>, D. Bates<sup>7</sup>,  
and W.V. Giannobile<sup>1,2\*</sup>

<sup>1</sup>Department of Periodontics & Oral Medicine, School of Dentistry, University of Michigan, Ann Arbor, MI, USA; <sup>2</sup>Michigan Center for Oral Health Research, University of Michigan Clinical Research Center, 1011 N. University Ave., Ann Arbor, MI 48109-1078, USA; <sup>3</sup>Private Practice, Boston, MA, USA; <sup>4</sup>Private Practice, Houston, TX, USA; <sup>5</sup>Biostatistics Department, School of Public Health, University of Michigan, Ann Arbor, MI, USA; <sup>6</sup>Department of Cariology, Restorative Sciences, and Endodontics, School of Dentistry, University of Michigan, Ann Arbor, MI, USA; and <sup>7</sup>Organogenesis, Inc., Canton, MA, USA; \*corresponding author, [william.giannobile@umich.edu](mailto:william.giannobile@umich.edu)

# Angiogenic Biomarkers and Healing of Living Cellular Constructs

*J Dent Res* DOI: 10.1177/0022034510389334

## APPENDIX

**Appendix Table.** Wound-healing Score Distribution

| Category       | Week 1 |           | Week 2 |           | Week 3 |           | Week 4 |           |
|----------------|--------|-----------|--------|-----------|--------|-----------|--------|-----------|
|                | LCC    | Autograft | LCC    | Autograft | LCC    | Autograft | LCC    | Autograft |
| Mature         | 0      | 0         | 5      | 5         | 25     | 18        | 39     | 40        |
| Erythema       | 20     | 32        | 33     | 36        | 17     | 24        | 4      | 3         |
| Bleeding       | 11     | 1         | 4      | 2         | 0      | 0         | 0      | 0         |
| Graft mobility | 4      | 2         | 0      | 0         | 0      | 0         | 0      | 0         |
| Suppuration    | 0      | 0         | 1      | 0         | 0      | 0         | 0      | 0         |
| Necrosis       | 0      | 0         | 0      | 0         | 0      | 0         | 0      | 0         |
| Missing        | 9      | 9         | 1      | 1         | 2      | 2         | 1      | 1         |

LCC, living cellular construct.

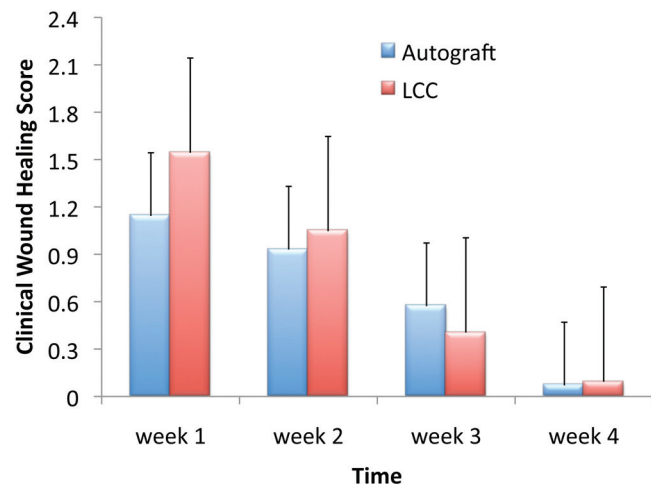

**Appendix Figure 1.** Wound-healing scores over time. Bars indicate  $\pm$  S.D. LCC = living cellular construct.

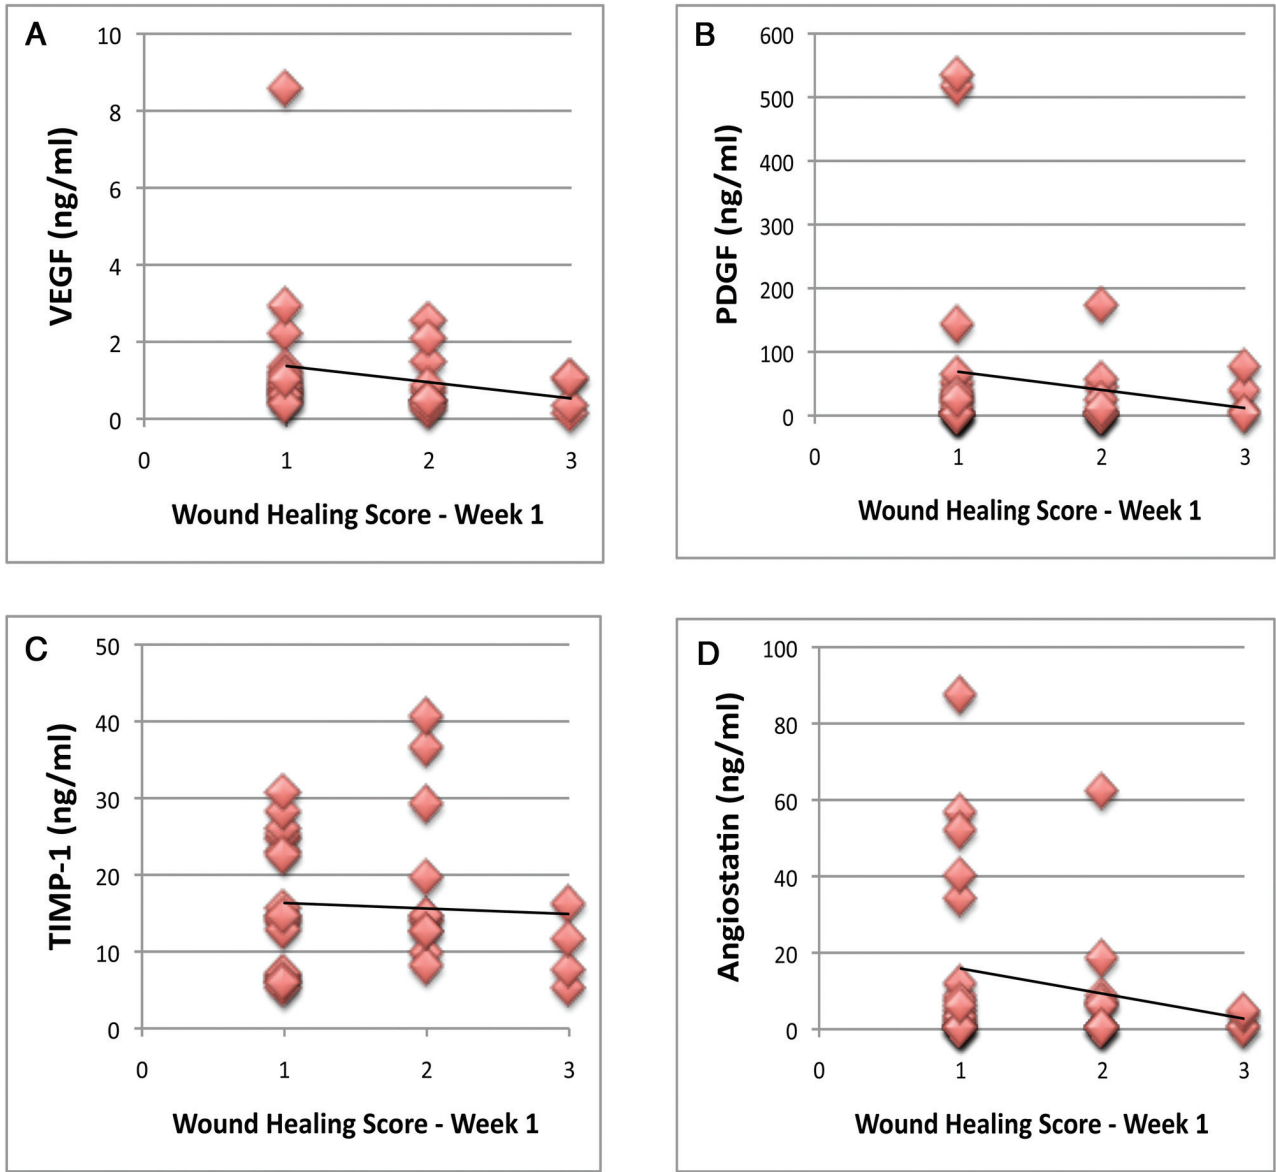

**Appendix Figure 2.** Correlation between wound-healing score and wound-fluid biomarkers. VEGF = vascular endothelial growth factor, PDGF = platelet-derived growth factor, TIMP-1 = tissue inhibitor of matrix metallo proteinases.
